# Supplementary material for: The Upregulation of GSTO2 is Associated with Colon Cancer Progression and a Poor Prognosis
Source: Hindawi journal article supplement (doi:10.1155/2023/4931650), 2023-01-11
Supplement: f1 [file 4931650.f1.zip]

T1 N1 T6 N6 T8 N8

40 kD  
35 kD

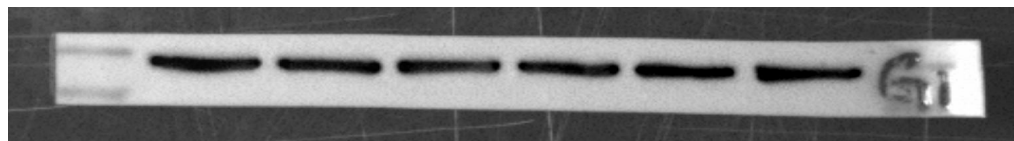

35 kD  
25 kD

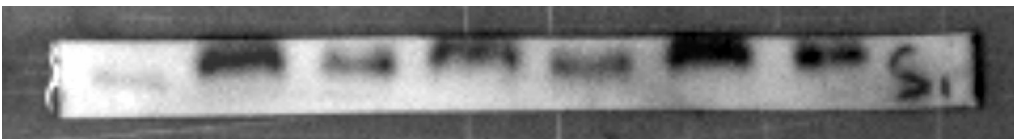

T9 N9 T13 N13 T21 N21

GAPDH 38KD

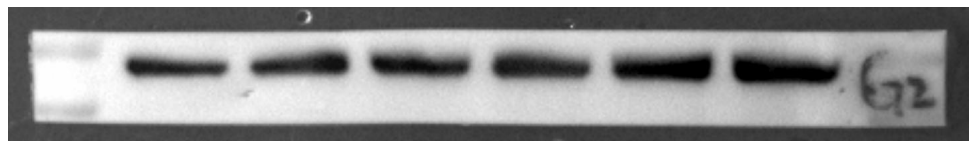

GSTO2 28KD

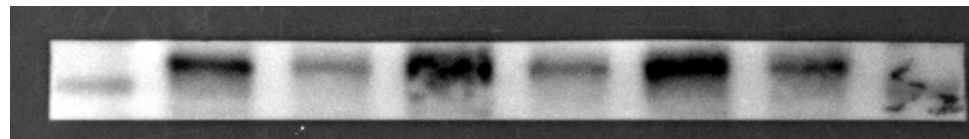

T1 N1 T6 N6 T8 N8

40 kD  
35 kD

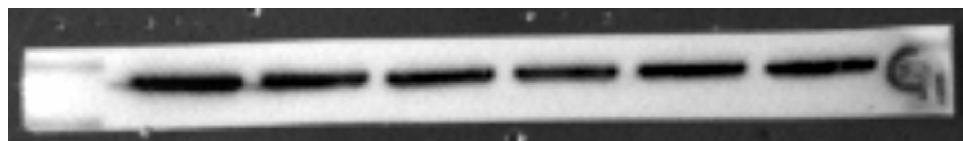

35 kD  
25 kD

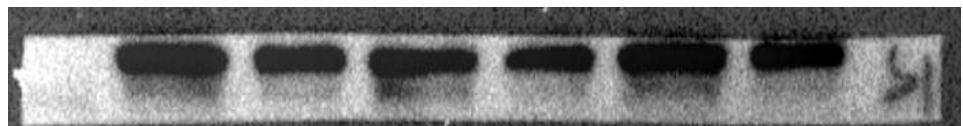

T9 N9 T13 N13 T21 N21

GAPDH 38KD

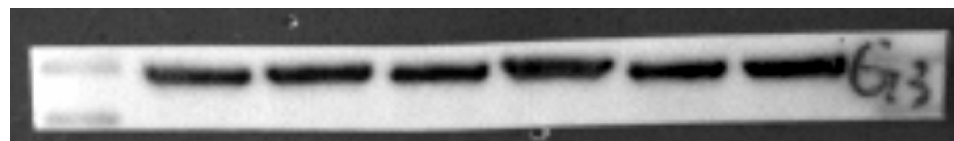

GSTO2 28KD

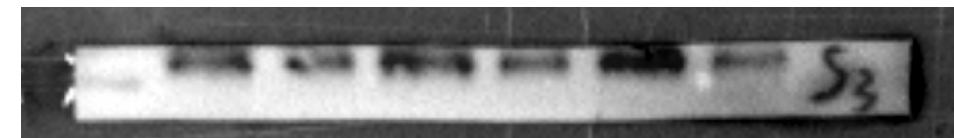

T1 N1 T6 N6 T8 N8

40 kD  
35 kD

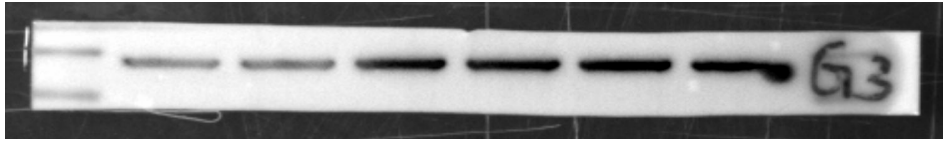

35 kD  
25 kD

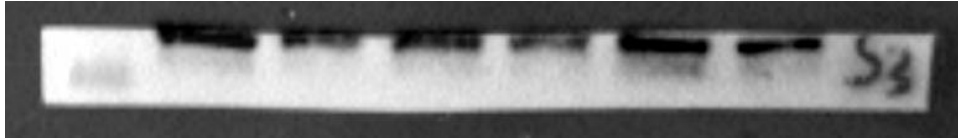

T9 N9 T13 N13 T21 N21

GAPDH 38KD

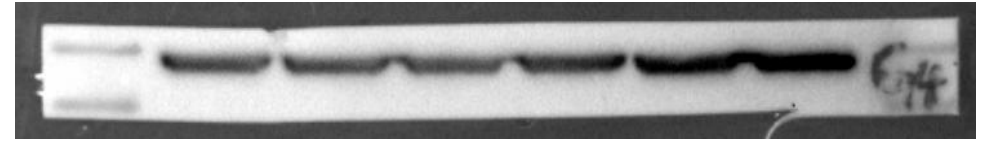

GSTO2 28KD

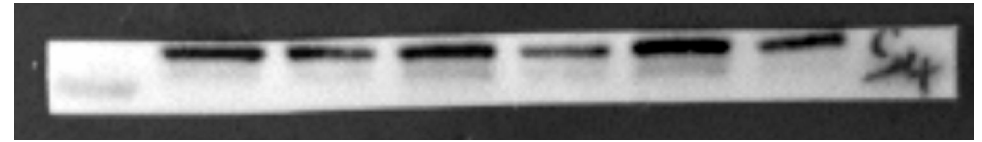

T1 N1 T6 N6 T8 N8

40 kD  
35 kD

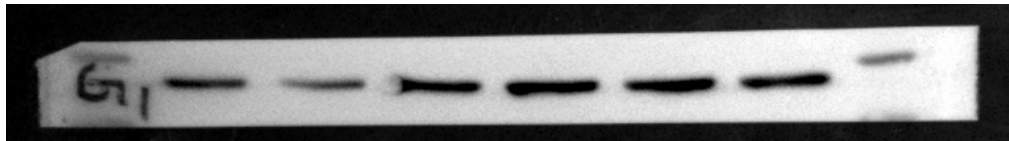

GAPDH 38KD

35 kD  
25 kD

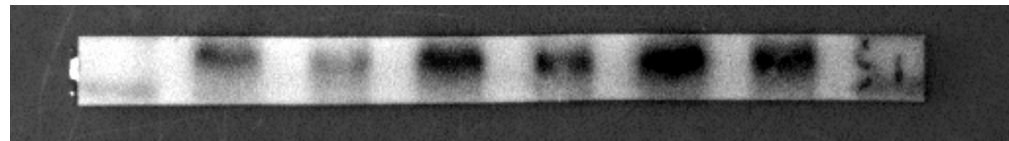

GSTO2 28KD

T1 N1 T6 N6 T8 N8

40 kD  
35 kD

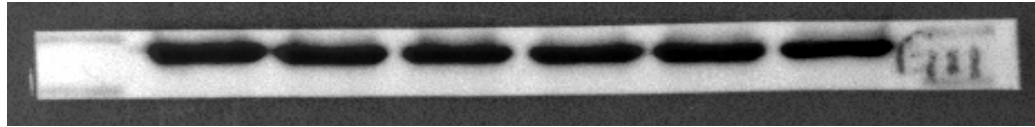

T9 N9 T13 N13 T21 N21

GAPDH 38KD

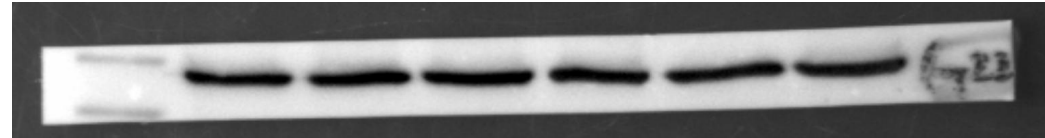

35 kD  
25 kD

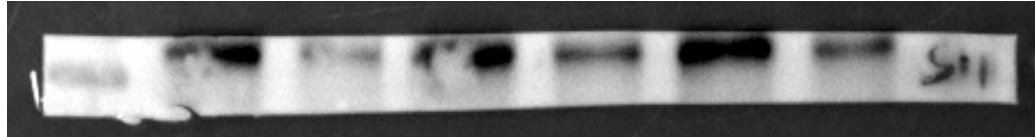

GSTO2 28KD

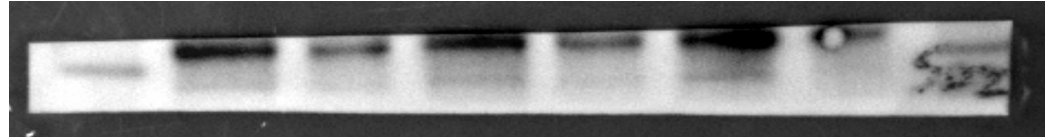

T1 N1 T6 N6 T8 N8

40 kD  
35 kD

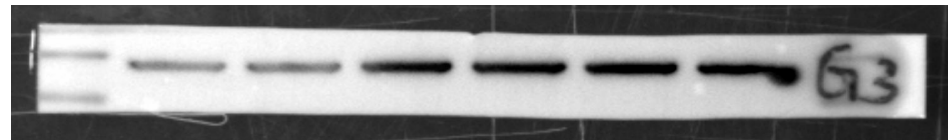

T9 N9 T13 N13 T21 N21

GAPDH 38KD

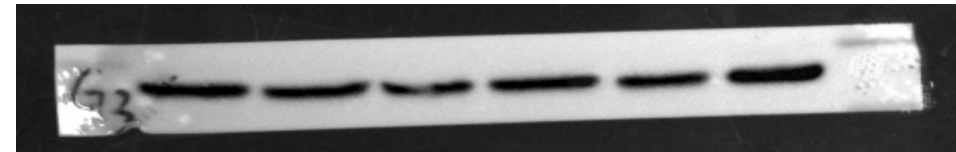

35 kD  
25 kD

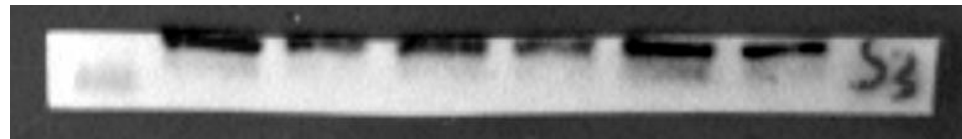

GSTO2 28KD

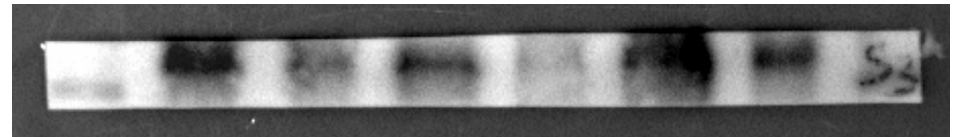

Colon Cancer Tissue

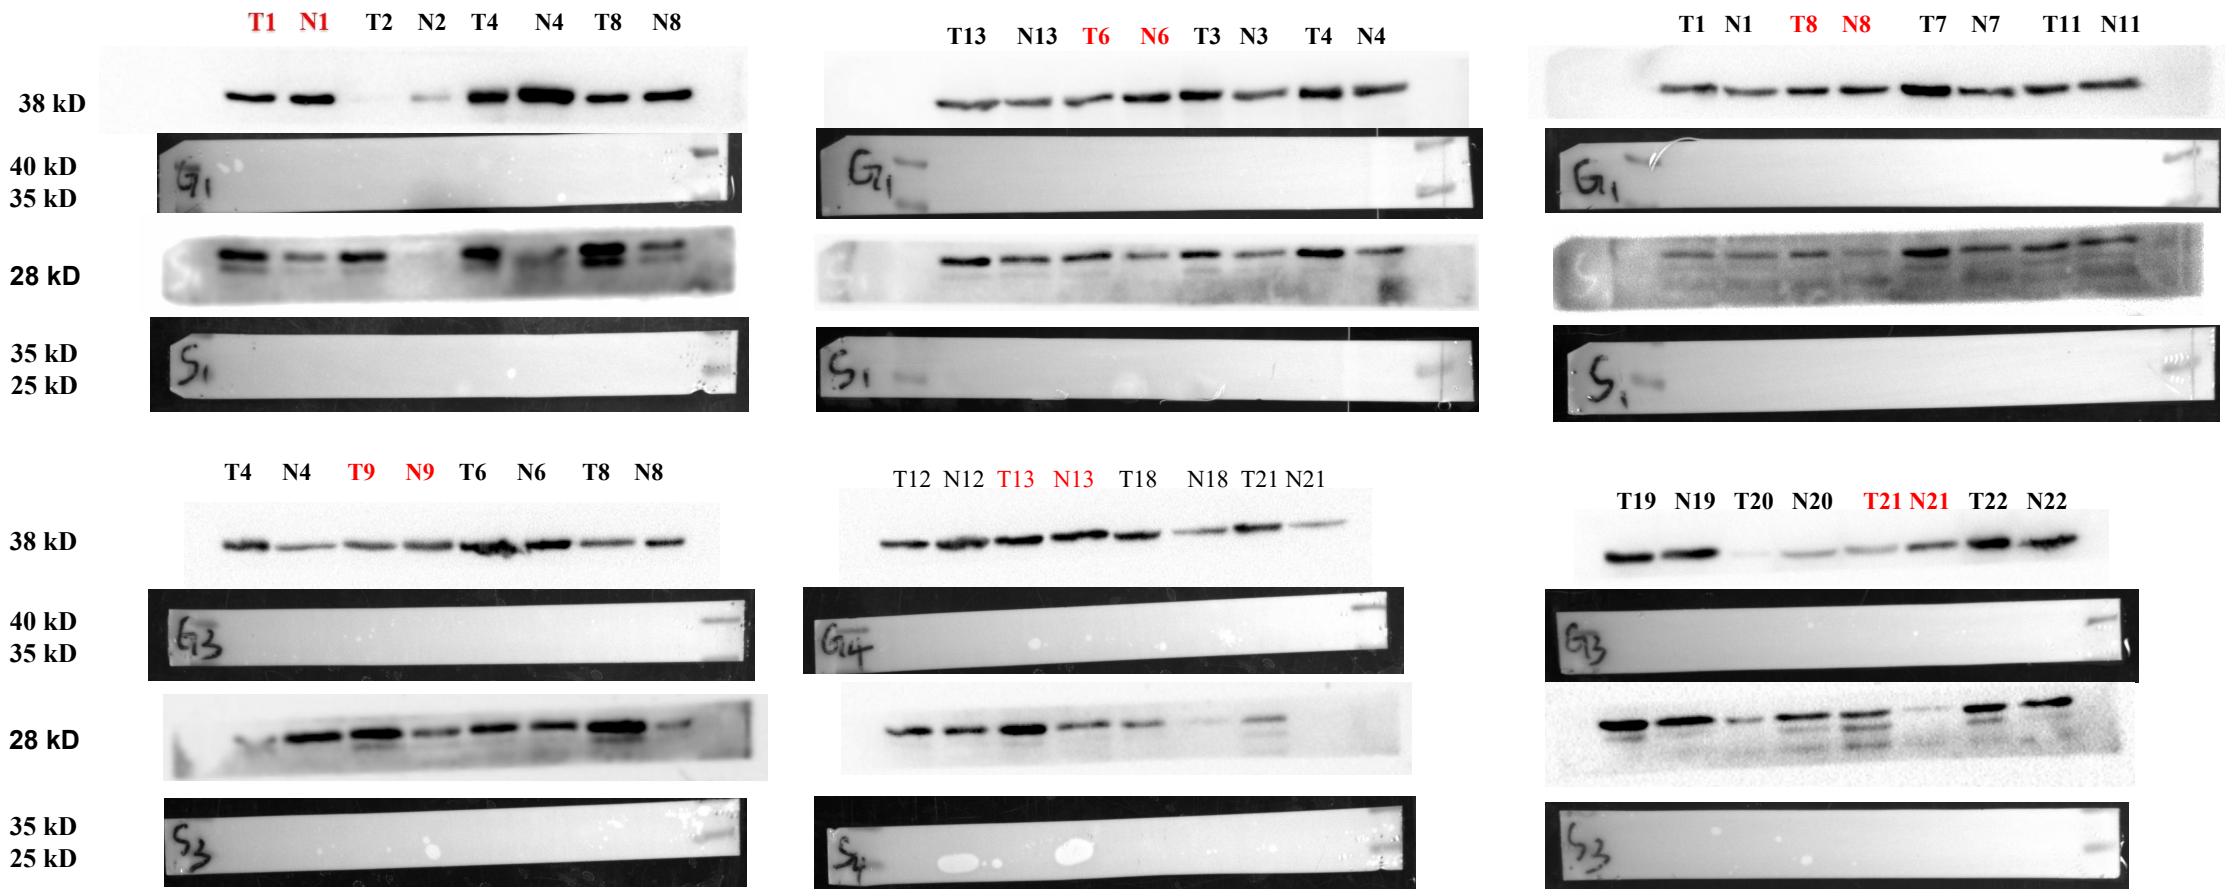

T:Tumor N:Normal The lane marked red is the original image of the tissue WB in Figure 4

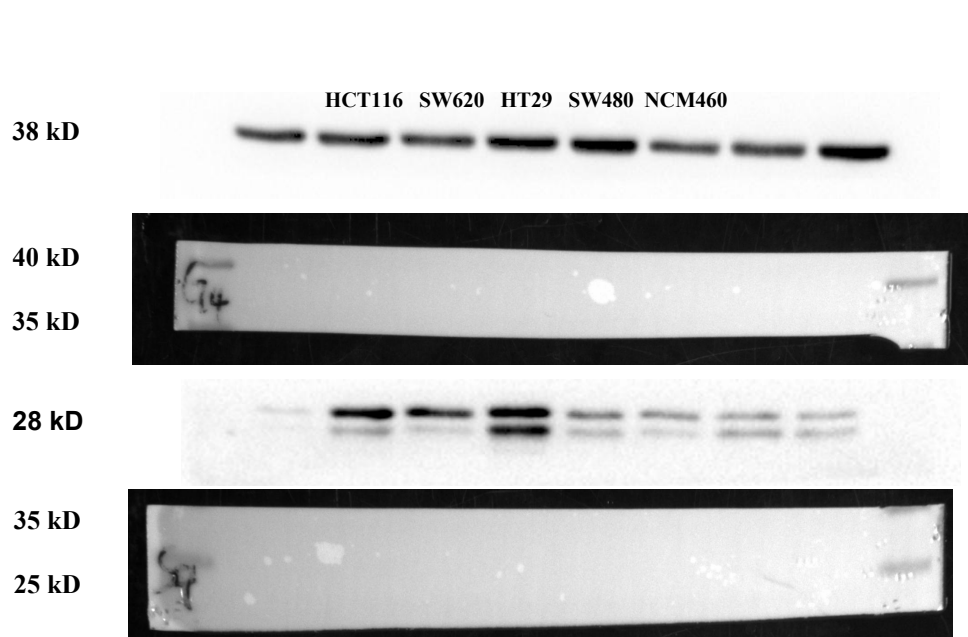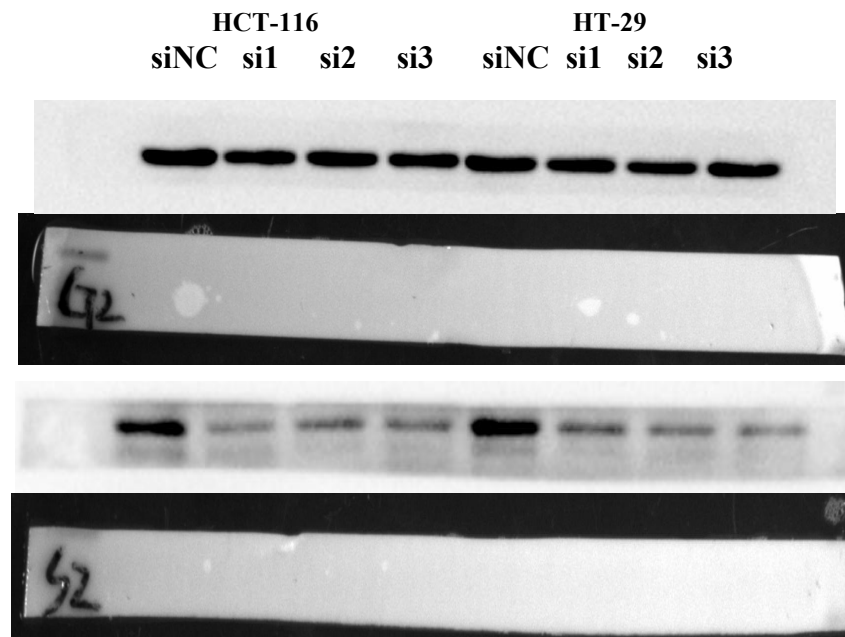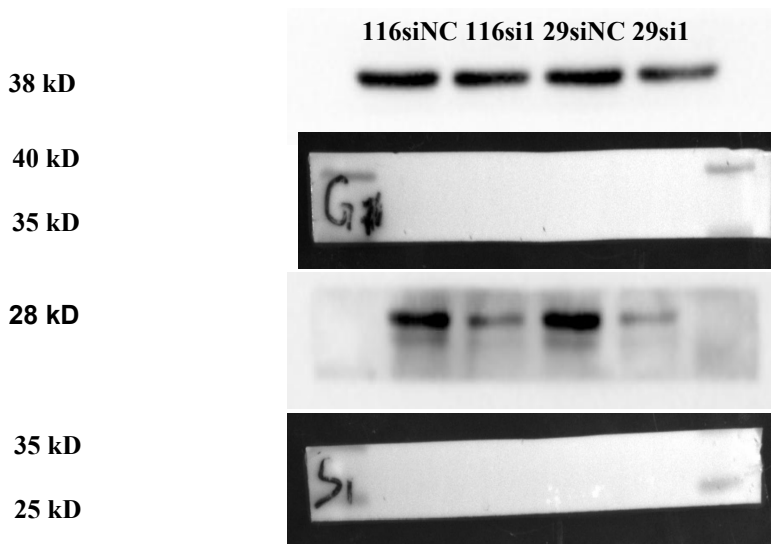

The original file of Figure 11
